# Supplementary material for: Gastrointestinal Manifestations and Low-FODMAP Protocol in a Cohort of Fabry Disease Adult Patients
Source: MDPI journal article supplement (doi:10.3390/nu15030658), 2023-01-28
Supplement: s1 [file s1]

# Gastrointestinal Manifestations and Low-FODMAP Protocol in a Cohort of Fabry Disease Adult Patients

**Supplementary Materials:** General characteristics of the FD patients in detail for each subject.

**Table S1.** Patients' general characteristics: sex (35,1% males, 64,9% females); age (years); genetic (gene mutation); disease form (classical, late or variant of uncertain significance (VUS)); therapy at the first evaluation (oral, ERT or no therapy); body mass index (kg/m<sup>2</sup>); adherence to Low FODMAPs protocol (yes, no or *in itinere*); IBS severity score; SF-12 score: physical (PCS12) and mental (MCS12).

| Patient | Sex | Age  | Genetic | Disease form | Therapy    | Body Mass Index | Low Fodmaps protocol | IBS severity score | PCS12 | MCS12 |
|---------|-----|------|---------|--------------|------------|-----------------|----------------------|--------------------|-------|-------|
| 1       | M   | 48,9 | GLA     | Late         | Oral       | 29,0            | no                   | 190                | 46,0  | 28,2  |
| 2       | F   | 43,5 | GLA     | Late         | ERT        | 20,3            | yes                  | 200                | 52,8  | 54,5  |
| 3       | M   | 16,8 | GLA     | Late         | No therapy | 26,1            | no                   | 2                  | 40,8  | 62,7  |
| 4       | M   | 18,9 | GLA     | Late         | No therapy | 23,7            | no                   | 2                  | 41,8  | 63,7  |
| 5       | F   | 35,6 | GLA     | Late         | Oral       | 24,9            | no                   | 85                 | 53,2  | 43,2  |
| 6       | M   | 56,1 | GLA     | Classic      | ERT        | 21,0            | yes                  | 148                | 32,6  | 53,6  |
| 7       | F   | 31,1 | GLA     | Late         | No therapy | 20,2            | <i>in itinere</i>    | 276                | 46,8  | 68,7  |
| 8       | F   | 61,0 | GLA     | Late         | No therapy | 19,8            | no                   | 276                | 47,8  | 69,7  |
| 9       | M   | 46,5 | GLA     | Classic      | ERT        | 20,3            | no                   | 170                | 39,8  | 61,7  |
| 10      | F   | 32,4 | GLA     | Classic      | ERT        | 20,8            | yes                  | 270                | 40,6  | 37,7  |
| 11      | F   | 26,4 | GLA     | Classic      | ERT        | 19,2            | no                   | 145                | 52,2  | 36,6  |
| 12      | F   | 23,5 | GLA     | Classic      | ERT        | 23,9            | yes                  | 245                | 45,6  | 30,9  |
| 13      | M   | 62,5 | GLA     | Classic      | ERT        | 23,7            | no                   | 290                | 42,8  | 64,7  |
| 14      | F   | 59,8 | GLA     | Late         | No therapy | 37,7            | no                   | 183                | 33,6  | 59,1  |
| 15      | F   | 56,8 | GLA     | Late         | No therapy | 44,5            | no                   | 33                 | 54,1  | 42,9  |
| 16      | F   | 19,2 | GLA     | VUS          | No therapy | 29,3            | no                   | 20                 | 52,7  | 50,7  |
| 17      | F   | 59,8 | GLA     | Classic      | No therapy | 20,4            | <i>in itinere</i>    | 193                | 55,1  | 53,3  |
| 18      | M   | 30,3 | GLA     | Classic      | No therapy | 18,4            | <i>in itinere</i>    | 110                | 56,6  | 53,7  |
| 19      | F   | 49,5 | GLA     | Late         | No therapy | 25,2            | no                   | 130                | 43,8  | 65,7  |
| 20      | M   | 32,3 | GLA     | VUS          | No therapy | 23,3            | no                   | 5                  | 45,8  | 67,7  |
| 21      | F   | 47,4 | GLA     | VUS          | No therapy | 35,2            | no                   | 83                 | 43,6  | 49,7  |
| 22      | M   | 50,2 | GLA     | Late         | Oral       | 22,6            | no                   | 20                 | 60,0  | 47,7  |
| 23      | M   | 49,1 | GLA     | Classic      | ERT        | 23,0            | yes                  | 220                | 55,0  | 35,9  |
| 24      | F   | 65,2 | GLA     | Late         | No therapy | 24,8            | no                   | 5                  | 36,2  | 49,3  |
| 25      | F   | 57,4 | GLA     | Late         | Oral       | 24,9            | no                   | 95                 | 48,8  | 38,7  |
| 26      | M   | 60,2 | GLA     | Late         | ERT        | 33,8            | no                   | 2                  | 44,8  | 66,7  |
| 27      | M   | 58,9 | GLA     | Late         | Oral       | 31,1            | no                   | 25                 | 52,5  | 46,8  |
| 28      | F   | 51,0 | GLA     | Late         | Oral       | 29,9            | yes                  | 245                | 46,7  | 38,1  |

|                    |   |             |            |                       |                    |             |                       |              |             |             |
|--------------------|---|-------------|------------|-----------------------|--------------------|-------------|-----------------------|--------------|-------------|-------------|
| 29                 | F | 56,2        | GLA        | VUS                   | Oral               | 36,0        | yes                   | 150          | 41,3        | 48,9        |
| 30                 | F | 75,1        | GLA        | Late                  | ERT                | 27,4        | no                    | 190          | 41,1        | 42,3        |
| 31                 | F | 82,0        | GLA        | Late                  | ERT                | 23,8        | no                    | 5            | 30,5        | 61,3        |
| 32                 | F | 48,3        | GLA        | Late                  | ERT                | 18,1        | no                    | 5            | 41,9        | 52,1        |
| 33                 | F | 52,0        | GLA        | Late                  | ERT                | 23,6        | no                    | 25           | 53,6        | 44,8        |
| 34                 | M | 75,6        | GLA        | Late                  | ERT                | 24,2        | no                    | 5            | 41,9        | 52,1        |
| 35                 | F | 48,3        | GLA        | Late                  | ERT                | 31,4        | no                    | 45           | 43,3        | 49,5        |
| 36                 | F | 32,8        | GLA        | Late                  | ERT                | 20,1        | <i>in itinere</i>     | 90           | 36,5        | 60,6        |
| <b>Mean values</b> |   | <b>47,6</b> | <b>GLA</b> | <b>63.9% Late,</b>    | <b>44.5% ERT,</b>  | <b>25,6</b> | <b>19.4% yes,</b>     | <b>116,2</b> | <b>45,6</b> | <b>51,5</b> |
|                    |   |             |            | <b>25% Classical,</b> | <b>19.4% Oral,</b> |             | <b>11.1% &amp; in</b> |              |             |             |
|                    |   |             |            | <b>11.2% VUS</b>      | <b>36.1% none</b>  |             | <b>itinere,</b>       |              |             |             |
|                    |   |             |            |                       |                    |             | <b>68.7% no</b>       |              |             |             |

### IBS severity score

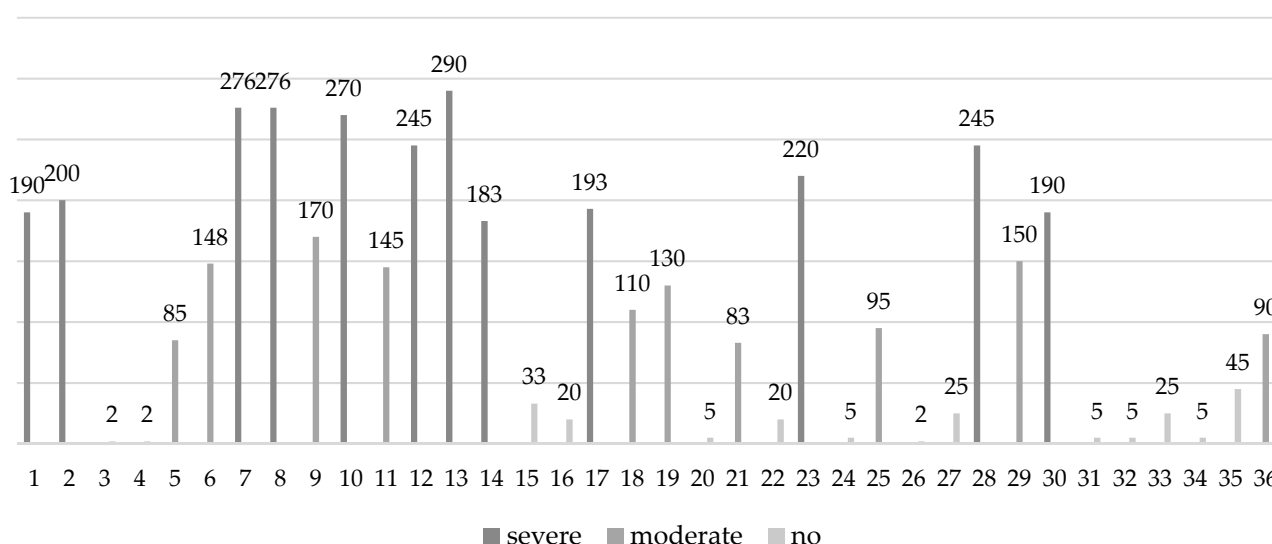

**Figure S1.** IBS severity score in all subjects (n. 36): severe GI manifestations in 33,3% of patients, moderate in 27,7%, no GI symptoms in 38,9% of subjects.

Disclaimer/Publisher's Note: The statements, opinions and data contained in all publications are solely those of the individual author(s) and contributor(s) and not of MDPI and/or the editor(s). MDPI and/or the editor(s) disclaim responsibility for any injury to people or property resulting from any ideas, methods, instructions or products referred to in the content.
